# Supplementary material
Source: PubMed Central journal article supplement (PMC2575958)
Supplement: 00294.2007_1.pdf [file 00294.2007_1.pdf]

**Supplemental Table 1. Number of gene expression probes corresponding to each class of genomic repeats and their correlation with serum folate profile.**

| Repeat Class/Family | Total # probes on array | Filter passed A/J | (-) correlation to A/J serum folate | Filter passed C57BL6/J | (-) correlation to C57BL/6J serum folate |
|---------------------|-------------------------|-------------------|-------------------------------------|------------------------|------------------------------------------|
| LINE/L1             | 60                      | 9                 | 0                                   | 2                      | 0                                        |
| LTR                 | 4                       | 0                 | 0                                   | 0                      | 0                                        |
| LTR/ERV1            | 12                      | 8                 | 0                                   | 6                      | 0                                        |
| LTR/ERVK (IAP)      | 27 (13)                 | 5 (2)             | 0 (0)                               | 9 (7)                  | 2 (2)                                    |
| LTR/ERVL            | 3                       | 0                 | 0                                   | 0                      | 0                                        |
| LTR/MaLR            | 23                      | 4                 | 0                                   | 1                      | 0                                        |
| SINE/Alu            | 4                       | 1                 | 0                                   | 0                      | 0                                        |
| SINE/B2             | 11                      | 1                 | 0                                   | 0                      | 0                                        |
| All probes          | 25798                   | 10322             | 117                                 | 7913                   | 230                                      |

Filter refers to number of genes that showed greater variation in greater gene expression variance across treatments compared to average variance among replicates. The threshold for negative correlation to serum folate profile was nominal p value 0.05.

**Supplemental Table 2. Number of gene expression probes corresponding to x-inactivated genes or imprinted genes and their correlation with serum folate profile.**

| Gene Class    | Total # probes on array | Filter passed A/J | (-) correlation to A/J serum folate | Filter passed C57BL6/J | (-) correlation to C57BL/6J serum folate |
|---------------|-------------------------|-------------------|-------------------------------------|------------------------|------------------------------------------|
| X-inactivated | 691                     | 258               | 3                                   | 190                    | 6                                        |
| Imprinted     | 71                      | 28                | 0                                   | 22                     | 0                                        |
| All probes    | 25798                   | 10322             | 117                                 | 7913                   | 230                                      |

Filter refers to number of genes that showed greater variation in greater gene expression variance across treatments compared to average variance among replicates. The threshold for negative correlation to serum folate profile was nominal p value 0.05.
